# Supplementary material for: Identification of circRNAs in the Liver of Whitespotted Bamboo Shark (Chiloscyllium plagiosum)
Source: PubMed Central journal article supplement (PMC7759564; doi:10.3389/fgene.2020.596308), 2020-12-11
Supplement: Presentation_1.pdf [file Presentation_1.pdf]

## Supplementary Figures

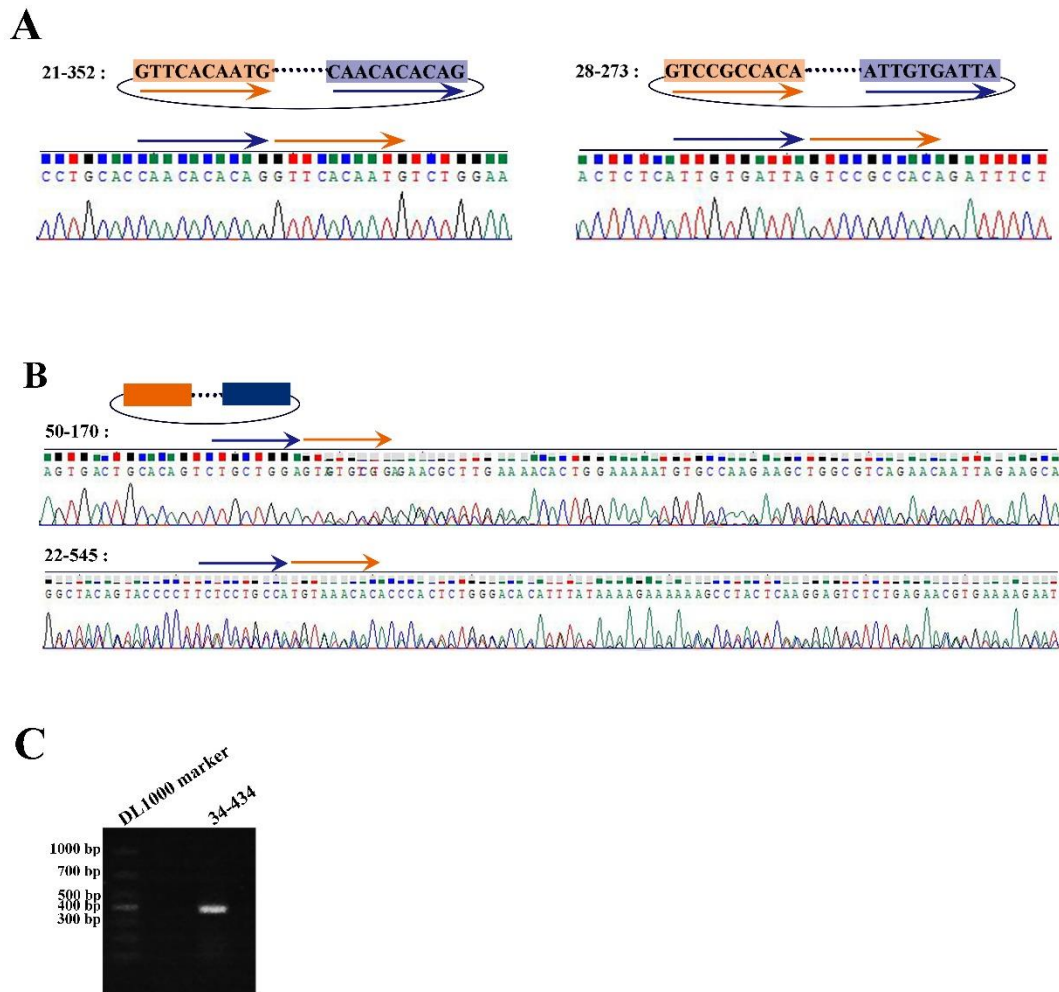

**Supplementary Figure 1.** Supplementary figure. (A) Sanger sequencing of 21-352 and 28-273 confirming the back-splicing junction in PCR products. (B) Sanger sequencing result of 50-170 and 22-545. (C) Amplification result of 34-434 using divergent PCR primers
